# Supplementary material for: Metagenomic profiling of long-read sequencing for clinical diagnosis of ocular inflammation
Source: bioRxiv or medRxiv preprint supplement (doi:10.1101/2023.01.20.23284817), 2023-01-24
Supplement: Supplementary file [file media-1.pdf]

# eFigure 1. Summary of metagenomic profiling result in all participants with mPCR-positive uveitis.

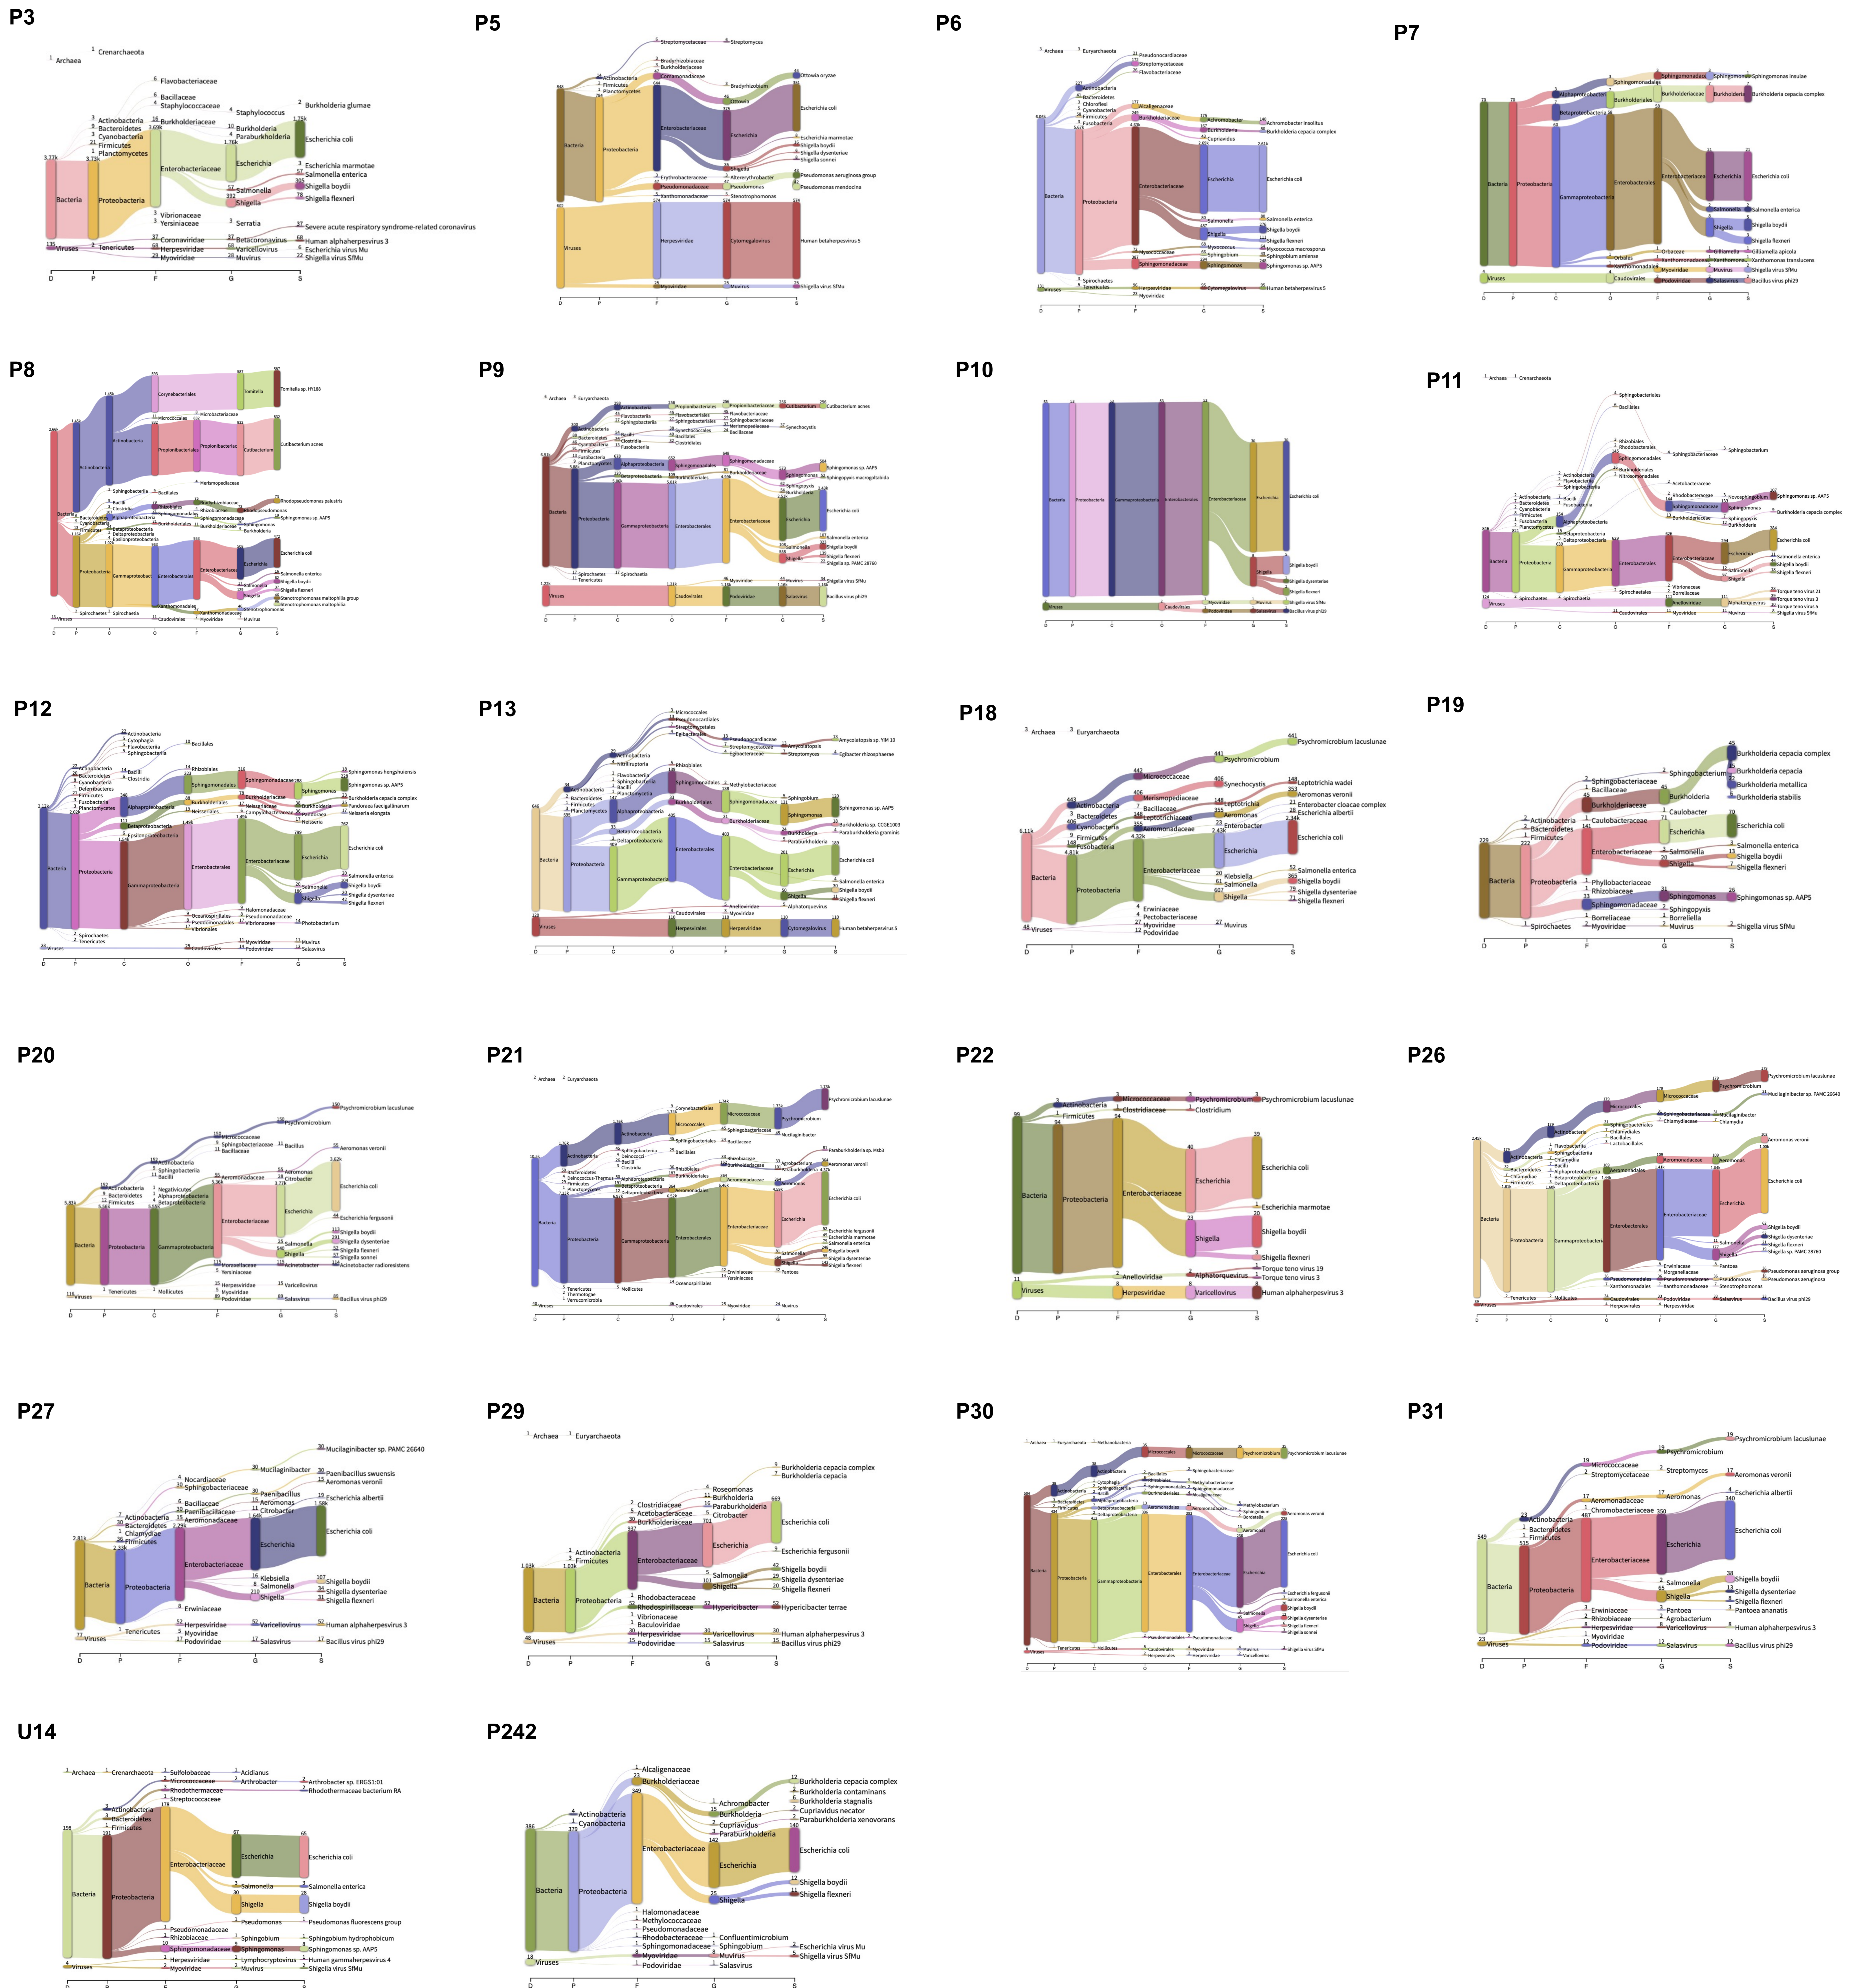

Summary of metagenomic profiling result in all participants with mPCR-positive uveitis were shown. The phylogenetic tree (Pagan plot) shows all microorganisms except the human genome, and from left to right, domain (D: Domain), phylum (P: Phylum), class (C: Class), family (F: Family), genus (G: Genus) and species (S: Species) are quantified.
