# Supplementary material for: Metagenomic profiling of long-read sequencing for clinical diagnosis of ocular inflammation
Source: bioRxiv or medRxiv preprint supplement (doi:10.1101/2023.01.20.23284817), 2023-01-24
Supplement: Supplementary file [file media-2.pdf]

**eFigure 2. *Tet(C)* region of the tetracycline (TC) resistance gene on the reference genome of a subtype of *Chlamydia trachomatis* mapped by Nanopore sequence reads.**

**Genome of *Chlamydia trachomatis* (NC\_021888.1)**

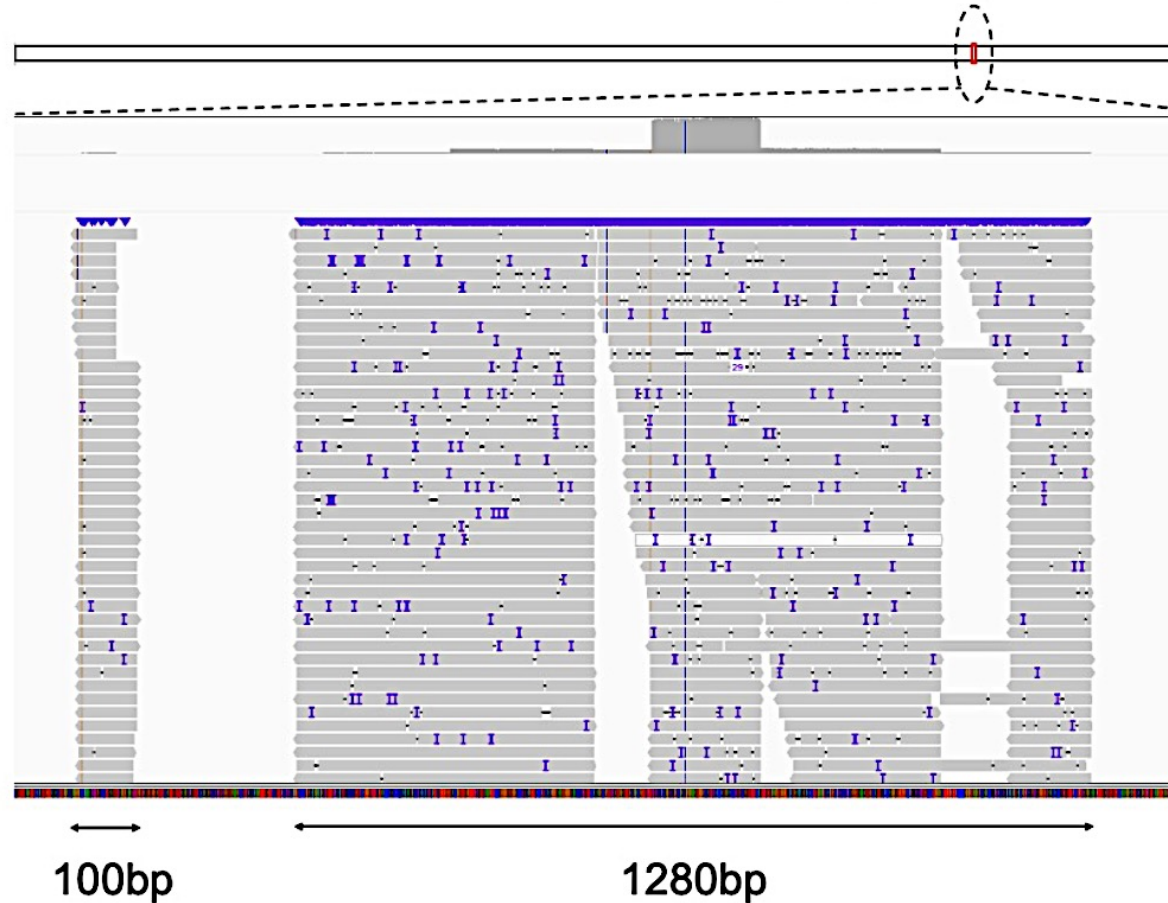

**Sequence reads from *Chlamydiae*-positive samples (P-26) were mapped to the genome of the *Chlamydia trachomatis* subtype and visualized in the Integrative Genomics Viewer. Sequence reads from *Chlamydiae*-positive samples are biasedly mapped to a common region of the genome. The region was searched with the Basic Local Alignment Search Tool and matched the *tet(C)* region of the TC gene, which has low species specificity.**
